# Supplementary material for: Partial oxidation of methanol over Au/CeO2–ZrO2 and Au/CeO2–ZrO2–TiO2 catalysts
Source: Royal Society of Chemistry journal article supplement (doi:10.1039/c5ra24025e), 2016-01-01
Supplement: c5ra24025e1.pdf [file c5ra24025e1.pdf]

**Table S1.** Activity and selectivity data for POM reaction over CeO<sub>2</sub>-ZrO<sub>2</sub> support, Au/ZrO<sub>2</sub>, Au/CeO<sub>2</sub>-ZrO<sub>2</sub> and Au/CeO<sub>2</sub>-TiO<sub>2</sub>-ZrO<sub>2</sub> catalysts at different temperatures ranges for O<sub>2</sub> : CH<sub>3</sub>OH molar feed ratio 0.5 and GHSV =30000 h<sup>-1</sup> with methanol flow rate 0.52 cm<sup>3</sup> hr<sup>-1</sup>.

| Catalysts                                               | Conversion& selectivity       | Temperature (°C) |       |       |       |       |       |       |       |
|---------------------------------------------------------|-------------------------------|------------------|-------|-------|-------|-------|-------|-------|-------|
|                                                         |                               | 275              | 300   | 325   | 350   | 375   | 400   | 425   | 450   |
| CeO <sub>2</sub> -ZrO <sub>2</sub>                      | O <sub>2</sub> Conversion     | 1.79             | 7.14  | 14.29 | 32.14 | 1.43  | 91.07 | 99.86 | 100   |
|                                                         | CH <sub>3</sub> OH Conversion | 2.75             | 3.89  | 7.89  | 15.91 | 45.08 | 51.37 | 61.4  | 64.87 |
|                                                         | H <sub>2</sub> Selectivity    | 0                | 0     | 0     | 0     | 4.59  | 10.52 | 16.46 | 21.69 |
|                                                         | CO Selectivity                | 0                | 0     | 0     | 31.79 | 35.49 | 48.22 | 58.29 | 66.19 |
| Au/ZrO <sub>2</sub>                                     | O <sub>2</sub> Conversion     | 7.22             | 17.59 | 32.41 | 59.6  | 75.93 | 85.56 | 91.85 | 96.3  |
|                                                         | CH <sub>3</sub> OH Conversion | 12.77            | 18.5  | 33.41 | 44.88 | 48.8  | 49.86 | 57.04 | 65.99 |
|                                                         | H <sub>2</sub> Selectivity    | 0                | 0     | 0     | 0     | 0     | 4.17  | 8.66  | 15.95 |
|                                                         | CO Selectivity                | 0                | 0     | 0     | 9.52  | 24.84 | 41.62 | 57.08 | 68.24 |
| Au/CeO <sub>2</sub> -ZrO <sub>2</sub>                   | O <sub>2</sub> Conversion     | 99.8             | 99.8  | 100   | 100   | 100   | 100   | 100   | 100   |
|                                                         | CH <sub>3</sub> OH Conversion | 49.1             | 58.9  | 70    | 81.4  | 91.6  | 94.3  | 97    | 98.79 |
|                                                         | H <sub>2</sub> Selectivity    | 31.6             | 44.8  | 57.1  | 68.7  | 75.5  | 68.1  | 63.1  | 57.8  |
|                                                         | CO Selectivity                | 7.5              | 9.9   | 16.3  | 19.5  | 22.3  | 42.7  | 58.5  | 62.17 |
|                                                         | Carbon balance                | 94.7             | 99.5  | 97.5  | 99.5  | 98.7  | 96.5  | 97.8  | 96.3  |
| Au/CeO <sub>2</sub> -ZrO <sub>2</sub> -TiO <sub>2</sub> | O <sub>2</sub> Conversion     | 99.8             | 99.8  | 99.8  | 100   | 100   | 100   | 100   | 100   |
|                                                         | CH <sub>3</sub> OH Conversion | 44.7             | 51.4  | 57.4  | 69.4  | 82.2  | 93.6  | 99.2  | 99.44 |
|                                                         | H <sub>2</sub> Selectivity    | 6                | 14.5  | 37.6  | 46.2  | 59.8  | 67.8  | 70.6  | 66.6  |
|                                                         | CO Selectivity                | 1.3              | 3.2   | 7.7   | 13.4  | 21    | 32.3  | 45    | 57.13 |
|                                                         | Carbon balance                | 94.7             | 92.9  | 97.5  | 94.2  | 92.3  | 93.0  | 93.7  | 96.9  |

Supplementary calculation for mole balance

### ***Carbon balance (For Au/CeZrO<sub>x</sub> catalyst at 375 °C)***

CH<sub>3</sub>OH moles IN = 0.00021485 moles/min

O<sub>2</sub> moles IN = 0.000112303 moles/min

Feed ratio O<sub>2</sub>:CH<sub>3</sub>OH = 0.491

Reactor outlet mole balance:

Exit flow rate 50 cc/min measured by bubble flow meter.

The product mole flow rate were calculated using GC response factor to evaluate the mole fraction for each element then multiplied by the total exit flow rate. Ideal gas rate law was assumed in all the calculations.

CH<sub>3</sub>OH moles out = 0.000018009 moles/min

O<sub>2</sub> moles out = 0.0 moles/min

H<sub>2</sub> moles out = 0.00029727 moles/min

CO moles out = 0.0000479 moles/min

CO<sub>2</sub> moles out = 0.000146257 moles/min

$$\text{Conversion of CH}_3\text{OH} = \frac{\text{Reacted moles of CH}_3\text{OH}}{\text{inlet moles of CH}_3\text{OH}} \times 100\% = 91.62\%$$

Selectivity of H<sub>2</sub>

$$= \frac{\text{moles of H}_2\text{ produced}}{\text{moles of CH}_3\text{OH reacted} \times 2} \times 100\% = \frac{0.00029727}{(0.00021485 - 0.000018009) \times 2} \times 100\% = 75.5\%$$

Carbon balance:

Moles of carbon IN = 0.00021485 moles/min

Moles of carbon out = 0.000018009 + 0.0000479 + 0.000146257  
= 0.000212166 moles/min

$$\text{Carbon balance} = \frac{\text{outlet moles of carbon}}{\text{Inlet moles of carbon}} \times 100\% = \frac{0.000212166}{0.00021485} \times 100\% = 98.7\%$$

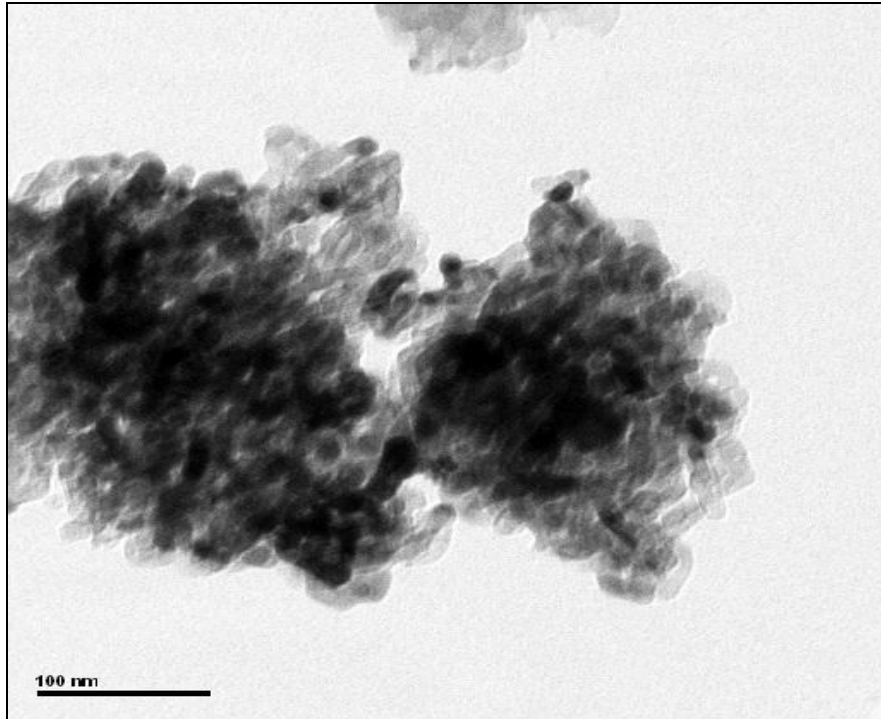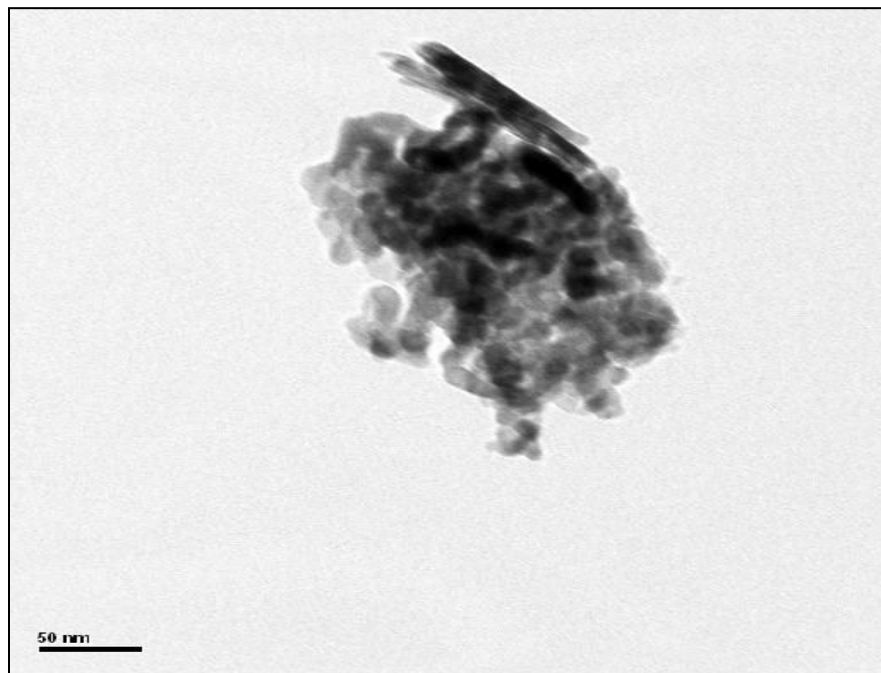

**Figure S1.** TEM (235KX magnification) show that the powders essentially comprised of finely divided material in the form of clusters. Each cluster consists of entangled tape-like structures, each strand being 5-10nm in width. Hence the overall material is very porous.
